# Supplementary material for: Nanostructure controlled sustained delivery of human growth hormone using injectable, biodegradable, pH/temperature responsive nanobiohybrid hydrogel
Source: Royal Society of Chemistry journal article supplement (doi:10.1039/c4nr05897f), 2015-01-01
Supplement: c4nr05897f1.pdf [file c4nr05897f1.pdf]

**Supplementary file:**

**Table 1:**

| Sample     | PCLA <sup>b</sup> -PEG <sup>a</sup> -PCLA <sup>b</sup> | CL/LA <sup>b</sup> | PCLA-PAEU [Tri-PAEU <sup>b</sup> ] <sub>x</sub> <sup>c</sup> | Mn <sup>c</sup> | PDI <sup>c</sup> |
|------------|--------------------------------------------------------|--------------------|--------------------------------------------------------------|-----------------|------------------|
| Triblock   | 897-2050-897                                           | 1.21               |                                                              | 4126            | 1.15             |
| Multiblock | 897-2050-897                                           | 1.21               | [3844-3266] <sub>1.14</sub>                                  | 8132            | 1.98             |

<sup>a</sup> Provided by Sigma-Aldrich; <sup>b</sup> calculated from <sup>1</sup>H-NMR; <sup>c</sup> measured and calculated by GPC.

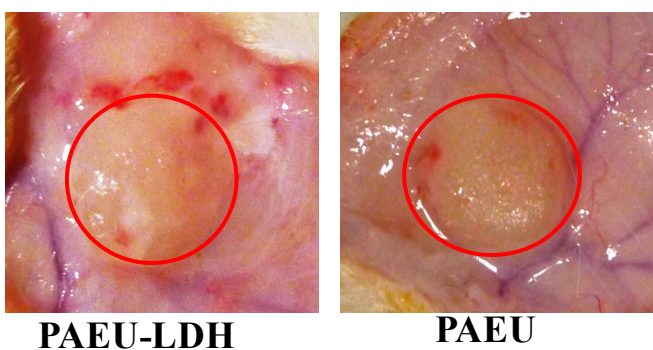

**Figure 1:** The solid hydrogel integrity within 15 min after subcutaneously injection into SD rats.

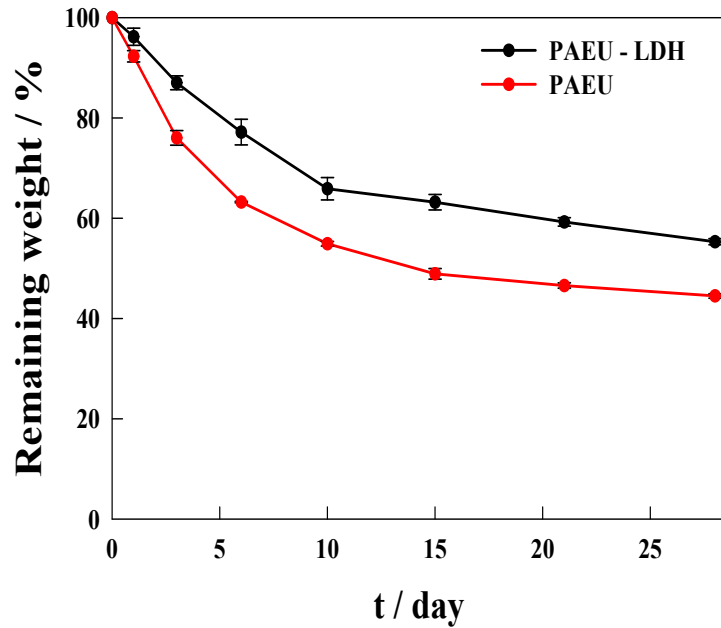

**Figure 2:** In vivo degradation of PAEU and PAEU/LDH hydrogel (15 wt%, pH 6.3) determined by the mass loss method

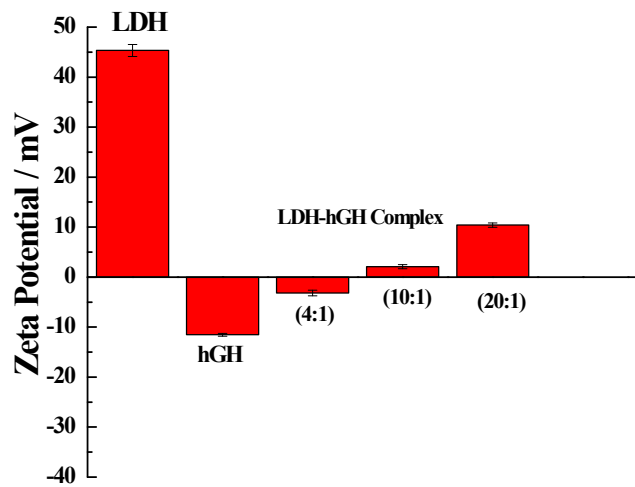

**Figure 3:** Zeta potential of the human growth hormone loaded LDH using various weight ratios were characterize in PBS at pH 7.4
